# Supplementary material for: Radiated and guided optical waves of a magnetic dipole-nanofiber system
Source: PubMed Central journal article supplement (PMC6401418; doi:10.1038/s41598-018-38115-z), 2019-03-05
Supplement: 41598_2018_38115_MOESM1_ESM.pdf [file 41598_2018_38115_MOESM1_ESM.pdf]

# 1 **Supplementary Materials**

## 2 **Radiated and guided optical waves of a magnetic** 3 **dipole-nanofiber system**

4 **Shaghik Atakaramians**<sup>1,2,\*</sup>, **Feng Q. Dong**<sup>2,\*\*</sup>, **Tanya M. Monroe**<sup>3,+</sup>, and  
5 **Shahraam Afshar V.**<sup>3,++</sup>

6 <sup>1</sup>School of Electrical Engineering and Telecommunications, UNSW Sydney, Sydney, NSW 2052, Australia

7 <sup>2</sup>Institute of Photonics and Optical Science, School of Physics, The University of Sydney, Sydney, NSW 2006,  
8 Australia

9 <sup>3</sup>Laser Physics and Photonic Devices Laboratories, School of Engineering, University of South Australia, Mawson  
10 Lakes, SA 5095, Australia

11 \*s.atakaramians@unsw.edu.au, T:+61431465884., F:+61293855993

12 \*\*fengqiu.dong@gmail.com

13 +tanya.monro@unisa.edu.au

14 ++shahraam.afshar@unisa.edu.au

### 15 **ABSTRACT**

16 Here we calculate the radiation modes of a step index fiber, where we derive all the electric and magnetic  
components.

### 17 **Radiation modes of a step index fiber**

To calculate the radiation modes, we separate the fields into two terms, one representing the field in the  
absence of the waveguide ('free-space') and a second term that includes scattering from the waveguide.<sup>1</sup>

The  $z$  components of radiation modes are then of the following form considering the boundary conditions

and avoiding the singularities of Bessel functions:<sup>1</sup>

$$e_z = \begin{cases} a_\nu J_\nu(UR) f_\nu(\theta) & 0 \leq r < r_{\text{co}} \\ [c_\nu^f J_\nu(QR) + c_\nu^s H_\nu^{(1)}(QR)] f_\nu(\theta) & r_{\text{co}} \leq r < \infty \end{cases} \quad (1)$$

$$h_z = \begin{cases} b_\nu J_\nu(UR) g_\nu(\theta) & 0 \leq r < r_{\text{co}} \\ [d_\nu^f J_\nu(QR) + d_\nu^s H_\nu^{(1)}(QR)] g_\nu(\theta) & r_{\text{co}} \leq r < \infty \end{cases} \quad (2)$$

$$f_\nu(\theta) = \begin{cases} \cos(\nu\theta) & \text{even modes} \\ \sin(\nu\theta) & \text{odd modes} \end{cases} \quad (3)$$

$$g_\nu(\theta) = \begin{cases} -\sin(\nu\theta) & \text{even modes} \\ \cos(\nu\theta) & \text{odd modes} \end{cases} \quad (4)$$

where  $\nu$  is an azimuthal mode index,  $Q = (D/2)(k^2 n_{\text{cl}}^2 - \beta^2)^{1/2}$ , the superscripts  $f$  and  $s$  denote the ‘free-space’ and scattering terms, respectively, and  $a_\nu$ ,  $b_\nu$ ,  $c_\nu^f$ ,  $c_\nu^s$ ,  $d_\nu^f$  and  $d_\nu^s$  are constants that can be determined by applying the continuity conditions at the core-cladding interface (see Table 1, which is taken from Ref. [1, page 525]). The four other components of the electric and magnetic field, ( $e_r$ ,  $e_\theta$ ,  $h_r$  and  $h_\theta$ ), can be expressed in terms of the derivatives of  $e_z$  and  $h_z$  as:

$$\begin{pmatrix} e_r \\ h_\theta \end{pmatrix} = \frac{i}{k^2 n^2 - \beta^2} \begin{pmatrix} \beta & \left(\frac{\mu_0}{\varepsilon_0}\right)^{1/2} k \\ \left(\frac{\varepsilon_0}{\mu_0}\right)^{1/2} kn^2 & \beta \end{pmatrix} \begin{pmatrix} \frac{\partial e_z}{\partial r} \\ \frac{1}{r} \frac{\partial h_z}{\partial \theta} \end{pmatrix}$$

$$\begin{pmatrix} e_\theta \\ h_r \end{pmatrix} = \frac{i}{k^2 n^2 - \beta^2} \begin{pmatrix} \beta & -\left(\frac{\mu_0}{\varepsilon_0}\right)^{1/2} k \\ -\left(\frac{\varepsilon_0}{\mu_0}\right)^{1/2} kn^2 & \beta \end{pmatrix} \begin{pmatrix} \frac{1}{r} \frac{\partial e_z}{\partial \theta} \\ \frac{\partial h_z}{\partial r} \end{pmatrix}$$

<sup>18</sup> Substituting the expressions for  $e_z$  and  $h_z$ , Eqs. (1) and (2), into the above equations, (5), gives:

For  $0 \leq r < r_{\text{co}}$ :

$$e_r = \frac{f_v(\theta)}{k^2 n_{\text{core}}^2 - \beta^2} \frac{iU}{2r_{\text{co}}} \left\{ \beta a_v [J_{v-1}(UR) - J_{v+1}(UR)] - \left( \frac{\mu_0}{\epsilon_0} \right)^{\frac{1}{2}} kb_v [J_{v-1}(UR) + J_{v+1}(UR)] \right\} \quad (5)$$

$$e_\theta = \frac{g_v(\phi)}{k^2 n_{\text{core}}^2 - \beta^2} \frac{iU}{2r_{\text{co}}} \left\{ \beta a_v [J_{v-1}(UR) + J_{v+1}(UR)] - \left( \frac{\mu_0}{\epsilon_0} \right)^{\frac{1}{2}} kb_v [J_{v-1}(UR) - J_{v+1}(UR)] \right\} \quad (6)$$

$$h_r = \frac{-g_v(\phi)}{k^2 n_{\text{core}}^2 - \beta^2} \frac{iU}{2r_{\text{co}}} \left\{ \left( \frac{\epsilon_0}{\mu_0} \right)^{\frac{1}{2}} k^2 n_{\text{core}}^2 a_v [J_{v-1}(UR) + J_{v+1}(UR)] - \beta b_v [J_{v-1}(UR) - J_{v+1}(UR)] \right\} \quad (7)$$

$$h_\theta = \frac{f_v(\theta)}{k^2 n_{\text{core}}^2 - \beta^2} \frac{iU}{2r_{\text{co}}} \left\{ \left( \frac{\epsilon_0}{\mu_0} \right)^{\frac{1}{2}} kn_{\text{core}}^2 a_v [J_{v-1}(UR) - J_{v+1}(UR)] - \beta b_v [J_{v-1}(UR) + J_{v+1}(UR)] \right\} \quad (8)$$

For  $r_{\text{co}} \leq r < \infty$

$$e_r = \frac{f_v(\phi)}{k^2 n_{\text{clad}}^2 - \beta^2} \frac{iQ}{2r_{\text{co}}} \left( \beta \left\{ c_v^f [J_{v-1}(QR) - J_{v+1}(QR)] + c_v^s [H_{v-1}^{(1)}(QR) - H_{v+1}^{(1)}(QR)] \right\} - k \left( \frac{\mu_0}{\epsilon_0} \right)^{\frac{1}{2}} \left\{ d_v^f [J_{v-1}(QR) - J_{v+1}(QR)] + d_v^s [H_{v-1}^{(1)}(QR) - H_{v+1}^{(1)}(QR)] \right\} \right) \quad (9)$$

$$e_{\theta} = \frac{g_v(\phi)}{k^2 n_{\text{clad}}^2 - \beta^2} \frac{iQ}{2r_{\text{co}}} \left( \beta \left\{ c_v^f [J_{v-1}(QR) + J_{v+1}(QR)] + c_v^s [H_{v-1}^{(1)}(QR) + H_{v+1}^{(1)}(QR)] \right\} \right. \\ \left. - k \left( \frac{\mu_0}{\epsilon_0} \right)^{\frac{1}{2}} \left\{ d_v^f [J_{v-1}(QR) + J_{v+1}(QR)] + d_v^s [H_{v-1}^{(1)}(QR) + H_{v+1}^{(1)}(QR)] \right\} \right) \quad (10)$$

$$h_{\theta} = \frac{f_v(\phi)}{k^2 n_{\text{clad}}^2 - \beta^2} \frac{iQ}{2r_{\text{co}}} \left( \left( \frac{\epsilon_0}{\mu_0} \right)^{\frac{1}{2}} kn_{\text{clad}}^2 \left\{ c_v^f [J_{v-1}(QR) - J_{v+1}(QR)] + c_v^s [H_{v-1}^{(1)}(QR) - H_{v+1}^{(1)}(QR)] \right\} \right. \\ \left. - \beta \left\{ d_v^f [J_{v-1}(QR) - J_{v+1}(QR)] + d_v^s [H_{v-1}^{(1)}(QR) - H_{v+1}^{(1)}(QR)] \right\} \right) \quad (11)$$

$$h_r = \frac{-g_v(\phi)}{k^2 n_{\text{clad}}^2 - \beta^2} \frac{iQ}{2r_{\text{co}}} \left( \left( \frac{\epsilon_0}{\mu_0} \right)^{\frac{1}{2}} kn_{\text{clad}}^2 \left\{ c_v^f [J_{v-1}(QR) + J_{v+1}(QR)] + c_v^s [H_{v-1}^{(1)}(QR) + H_{v+1}^{(1)}(QR)] \right\} \right. \\ \left. - \beta \left\{ d_v^f [J_{v-1}(QR) + J_{v+1}(QR)] + d_v^s [H_{v-1}^{(1)}(QR) + H_{v+1}^{(1)}(QR)] \right\} \right) \quad (12)$$

<sup>19</sup> where  $U = r_{\text{co}}(k^2 n_{\text{co}}^2 - \beta^2)^{1/2}$ ,  $V^2 = U^2 - Q^2$ , and  $R = r/r_{\text{co}}$ .

**Table 1.** Coefficients appearing in Eqs. (1) and (2) for ‘TM-like’ (ITM) and ‘TE-like’ (ITE) radiation modes. These correspond to the pure TM and TE modes in the ‘free-space’ terms that are subsequently altered by the perturbation of the waveguide<sup>1</sup>.

|         | ITE modes                                                                                                                                                                     | ITM modes                                                                                                                                                                             |
|---------|-------------------------------------------------------------------------------------------------------------------------------------------------------------------------------|---------------------------------------------------------------------------------------------------------------------------------------------------------------------------------------|
| $a_v$   | $-\frac{4}{\pi} \frac{\beta}{kn_{co}^2} \frac{v}{kr_{co}} \frac{V^2}{U^2 Q^3} \frac{1}{J_v(U)H_v^{(1)}(Q)M_v}$                                                                | $-\frac{4}{\pi} \frac{n_{cl}^2}{n_{co}^2} \frac{1}{\beta r_{co} Q} \frac{F_v}{J_v(U)H_v^{(1)}(Q)M_v}$                                                                                 |
| $b_v$   | $-\frac{4}{\pi} \left(\frac{\epsilon_0}{\mu_0}\right)^{\frac{1}{2}} \frac{1}{Qkr_{co}} \frac{G_v}{J_v(U)H_v^{(1)}(Q)M_v}$                                                     | $-\frac{4}{\pi} \frac{n_{cl}^2}{n_{co}^2} \left(\frac{\epsilon_0}{\mu_0}\right)^{\frac{1}{2}} \frac{v}{kr_{co}} \frac{V^2}{U^2 Q^3} \frac{1}{J_v(U)H_v^{(1)}(Q)M_v}$                  |
| $c_v^f$ | 0                                                                                                                                                                             | $2i \frac{Q}{\beta r_{co}}$                                                                                                                                                           |
| $c_v^s$ | $-\frac{4}{\pi} \frac{\beta}{kn_{co}^2} \frac{v}{kr_{co}} \frac{V^2}{U^2 Q^3} \frac{1}{\{H_v^{(1)}(Q)\}^2 M_v}$                                                               | $-2i \frac{Q}{\beta r_{co}} \frac{J_v(Q)}{H_v^{(1)}(Q)} \frac{A_v}{M_v}$                                                                                                              |
| $d_v^f$ | $2i \left(\frac{\epsilon_0}{\mu_0}\right)^{\frac{1}{2}} \frac{Q}{r_{co} k}$                                                                                                   | 0                                                                                                                                                                                     |
| $d_v^s$ | $-2i \left(\frac{\epsilon_0}{\mu_0}\right)^{\frac{1}{2}} \frac{Q}{r_{co} k} \frac{J_v(Q)}{H_v^{(1)}(Q)} \frac{B_v}{M_v}$                                                      | $-\frac{4}{\pi} \frac{n_{cl}^2}{n_{co}^2} \left(\frac{\epsilon_0}{\mu_0}\right)^{\frac{1}{2}} \frac{v}{r_{co} k} \frac{V^2}{U^2 Q^3} \frac{1}{\{H_v^{(1)}(Q)\}^2 M_v}$                |
| $N_j$   | $\frac{2\pi r_{co}^2}{Q} \left(\frac{\epsilon_0}{\mu_0}\right)^{\frac{1}{2}} \frac{\beta}{k} \times \begin{cases} 1 & \text{for } v > 0 \\ 2 & \text{for } v = 0 \end{cases}$ | $\frac{2\pi r_{co}^2}{Q} \left(\frac{\epsilon_0}{\mu_0}\right)^{\frac{1}{2}} \frac{kn_{cl}^2}{\beta} \times \begin{cases} 1 & \text{for } v > 0 \\ 2 & \text{for } v = 0 \end{cases}$ |

$$F_v = \frac{J'_v(U)}{UJ_v(U)} - \frac{H_v^{(1)'}(Q)}{QH_v^{(1)}(Q)} \quad (13)$$

$$G_v = \frac{J'_v(U)}{UJ_v(U)} - \frac{n_{cl}^2}{n_{co}^2} \frac{H_v^{(1)'}(Q)}{QH_v^{(1)}(Q)} \quad (14)$$

$$A_v = M_v - \frac{2i}{\pi} \frac{n_{cl}^2}{n_{co}^2} \frac{F_v}{Q^2 J_v(Q) H_v^{(1)}(Q)} \quad (15)$$

$$B_v = M_v - \frac{2i}{\pi} \frac{G_v}{Q^2 J_v(Q) H_v^{(1)}(Q)} \quad (16)$$

$$M_v = \left(\frac{v\beta}{kn_{co}}\right)^2 \left(\frac{V}{UQ}\right)^4 - F_v G_v \quad (17)$$

20 **References**

- 21 **1.** Snyder, A. W. & Love, J. *Optical Waveguide Theory* (Chapman and Hall Ltd, 1983), 1st edition edn.
